# Supplementary material for: Multispecies mass mortality of marine fauna linked to a toxic dinoflagellate bloom
Source: PLOS journal article supplement (doi:10.1371/journal.pone.0176299), 2017-05-04
Supplement: S3 (10.1371/journal.pone.0176299.s003) [file journal.pone.0176299.s003]

**S1 Table. Concentrations of paralytic shellfish toxins (PST) in tissues of dead invertebrates and fish collected on beaches or drifting.** Diet key Ag: macroalgae, B: birds, F: fish, M: molluscs, Ma: other macro-invertebrates, N: necrophage, Pl: plankton. Viscera comprise all soft internal organs sampled together. % +: Percentage of individuals (pool) which tested positive to STX, n.d.: not detected, (HPLC): Results from High Performance Liquid Chromatography, COD PST likelihood: number of animals/total examined at necropsy for which cause of death (COD) suspected to be PST based on case definition of laboratory documentation of exposure to the toxin, evidence of acute death (good body condition, food in stomach) and the absence of other significant pathologies.

| Species common name<br>( <i>Latin name</i> ) | Major Diet | Samples tested by ELISA |     | Corresponding tissues |     | PST concentration (µg/100g) |        | COD PST likelihood |
|----------------------------------------------|------------|-------------------------|-----|-----------------------|-----|-----------------------------|--------|--------------------|
|                                              |            | N (indiv.)              | % + | Tissue (n)            | % + | ELISA                       | HPLC   |                    |
| <b>Crustaceans</b>                           |            |                         |     |                       |     |                             |        |                    |
| rock crab                                    | Ma, N      | 4                       | 100 | Flesh (2)             | 50  | 5.8                         |        |                    |
| ( <i>Cancer irroratus</i> )                  |            |                         |     | Stomach contents (1)  | 100 | 5.7                         |        |                    |
|                                              |            |                         |     | Gill (1)              | 0   | n.d.                        |        |                    |
|                                              |            |                         |     | Gonad (1)             | 100 | 13.3                        |        |                    |
|                                              |            |                         |     | Hepatopancreas (1)    | 100 | 37                          |        |                    |
|                                              |            |                         |     | Viscera (1)           | 100 | 9.2                         |        |                    |
| <b>Molluscs</b>                              |            |                         |     |                       |     |                             |        |                    |
| waved whelk                                  | N          | 1                       | 100 | Flesh (1)             | 100 | 8.6                         |        |                    |
| ( <i>Buccinum undatum</i> )                  |            |                         |     | Viscera (1)           | 100 | 83                          |        |                    |
| <b>Fish</b>                                  |            |                         |     |                       |     |                             |        |                    |
| sand lance                                   | Pl         | 8 (53)                  | 100 | Gonad (1)             | 100 | 270                         |        |                    |
| ( <i>Ammodytes</i> spp.)                     |            |                         |     | Head (3)              | 100 | 18-84                       |        |                    |
|                                              |            |                         |     | Viscera (1)           | 100 | 1321                        |        |                    |
|                                              |            |                         |     | Stomach contents (1)  | 100 | 93                          | 1922   |                    |
|                                              |            |                         |     | Liver (2)             | 100 | 56-113                      | 435    |                    |
|                                              |            |                         |     | Digestive tract (1)   | 100 | 1010                        |        |                    |
| rainbow smelt                                | Pl, F      | 6 (114)                 | 50  | Head (6)              | 0   | n.d.                        |        | 1/1                |
| ( <i>Osmerus mordax</i> )                    |            |                         |     | Viscera (6)           | 50  | n.d.-10                     | 0.2-23 |                    |
| Atlantic sturgeon                            | Ma, M      | 1                       | 100 | Stomach contents (1)  | 100 | 33                          | 24     | 1/1                |
| ( <i>Acipenser oxyrhynchus</i> )             |            |                         |     | Liver (1)             | 100 | 11                          |        |                    |
